# Supplementary material for: Mechanical Tensions Regulate Gene Expression in the Xenopus laevis Axial Tissues
Source: MDPI journal article supplement (doi:10.3390/ijms25020870), 2024-01-10
Supplement: s1 [file s1]

**Table S1. Primers for qRT-PCR**

| gene                           | primers sequences                                 | band length | NCBI №                           |
|--------------------------------|---------------------------------------------------|-------------|----------------------------------|
| Efα                            | GTTTATTTACCGCACAGGTTATCA<br>ACACAGGGGCATATCCAGCA  | 70          | NM_001087442.1                   |
| ODC                            | GCCAGTTCTAACAAAGAAACCCA<br>TCTACGATACGATCCAGCCCA  | 93          | NM_001086698.1                   |
| tbxt                           | CACCACCTACCTCAAGTCAGTA<br>TTCCATTACTTATTCCTCCAGA  | 95          | NM_001091696.1<br>NM_001090578.1 |
| socs3.S                        | CACTCGAGAGCTGTTGATTAAATGT<br>TCAGTTCTTCCGCACAGCAA | 104         | NM_001087305.2                   |
| mmp21.L                        | AAACAATCACCCCAAGGGCA<br>TTGTGCTGACGACTTTCCA       | 105         | NM_001085816.1                   |
| myf5                           | GATCTACAGACAAGTTTCT<br>AATAGGGAGGGAGCATTGCT       | 108         | NM_001101779.2<br>XM_018256033.2 |
| fst.L                          | TGGATCTTGCAACTCCATTGT<br>TCCAACAGTTTTGGGAGCTG     | 108         | NM_001090590.1                   |
| frzb2.S                        | CTCTACCCGTAGAACAGTGCC<br>CAAGTATTGGCTTGGAAGTGCT   | 80          | XM_018261409.2<br>NM_001088556.1 |
| tbx6.S                         | AGTCTATACTCCTGCAGCCCC<br>TTCCGCTTGTCTTTGGCTG      | 117         | XM_041578795.1                   |
| irx3                           | CTCGGTGTCTCTCACACAGCC<br>ACTGTACTGGGTCGATCTGTT    | 104         | NM_001090735.1<br>XM_018260411.2 |
| cer1.S                         | ACCTTGCCCTTCACTCAGAATA<br>TCGTCGATCTTGCTGATTTGGA  | 117         | NM_001088331.2                   |
| adamts7.L                      | TGAAGGTTTTCTGTGTGGGA<br>TCTGGACAGGGGCTTCTAGT      | 108         | XM_041586924.1                   |
| shh.L                          | ACTGTTCTGGTCAAAGCAGAGAA<br>GGTGCCACCAAATTCCACC    | 92          | NM_001088313.1                   |
| gbx2.1.S                       | GGAGAAGATGGCAATAAGACCTACA<br>CACGGACTGGACCCAGAGAA | 88          | NM_001090431.1                   |
| sfrp1                          | CCACGGTCACGAAAGACAGA<br>TCAGAGCAAAGTCACTGGCG      | 97          | NM_001087488.1                   |
| foxc2                          | GGGACAGACTGCTGCACCCT<br>AAAGTCTGCTGCTGGGAGCC      | 90          | NM_001096491.2<br>NM_001090451.1 |
| lef1.S                         | GGGCCGGACCTACCTACATT<br>CATATGGTGTGGATACCAGCC     | 87          | NM_001096734.1                   |
| nalcn.S                        | GATTACCAGCTGGACGGTCA<br>GTCTTGTCACCATTCTTCACA     | 105         | XM_041584261.1                   |
| tbxt.2.S                       | CTGGTTACTCACAGTTGGGCA<br>GATGGTATTGGCAGTGGCCC     | 103         | NM_001085559.1                   |
| gsc                            | AGAGAGGAAAAAGTAGAGGTTT<br>TCCACTTTTGGGCATTTTCTG   | 100         | NM_001087809.1<br>XM_018230459.2 |
| cd82                           | GCCGTGTACAAAGCGGGCT<br>ACTCCCACGCAGACTCCCA        | 87          | NM_001092348.1<br>NM_001091678.1 |
| prss81.4.S                     | ACTTGGGCCTCCTTGGAATTT<br>TGAAGGTGGGTTTGTGCTGG     | 109         | XM_041577978.1                   |
| otx2                           | TGGGGGTATGGACTGTGGAT<br>CTGGTTAAGGTGACTTGCTACT    | 117         | NM_001090691.1<br>NM_001091486.1 |
| LOC108716930<br>(tmem116)      | ATTACTGCTGACCAACGGAA<br>CACCCCATCAGGACCAGAA       | 119         | XM_018263523.2                   |
| apobec2.L                      | CCGCTGCACTTACATTTGGA<br>CGCTGTAATGTCAACAGCCC      | 113         | NM_001092842.1                   |
| tnfrsf12a.L                    | CCGCAGGAAAAGCAAGTTCAC<br>GTCCTATAGCTGTGACCTCTCG   | 102         | NM_001090171.1                   |
| fbn3                           | AACTGCTTCCTGCAGTGTG<br>GGATGGATACAGCATTGTGT       | 107         | XM_041579837.1<br>XM_041579835.1 |
| LOC108700343<br>(DDB_G0277449) | GCCCCGACTCAACTCATCA<br>GACACATAACTCACCTGTCCAA     | 100         | XM_018233450                     |
| foxc1.S                        | TCCTCCTCATCCAAAATGTCC<br>TTCCGAGTTTAACTGTCCCA     | 93          | NM_001088214.2                   |

|              |                                                     |     |                                  |
|--------------|-----------------------------------------------------|-----|----------------------------------|
| six3         | GCCGCTAAGAACAGGCTTCA<br>CGTCGAAGGAGACTCGGC          | 105 | XM_018265033.2<br>NM_001085702.1 |
| otx1.S       | AACTGACCTCACTGACCCCG<br>TAACGGGTCTTGGCGAACAG        | 95  | XM_041564173.1                   |
| aplnr.S      | GCTTCTTATCCTTATGTACTGTGCC<br>TGTTAAGGCTCCCCCTCTCT   | 117 | NM_001086378.1                   |
| frmpd1.L     | CACAAACATCTCCAGGTTCAAA<br>TTTTGAGTTTCTCTGGTGCCT     | 102 | XM_041562636                     |
| cebpa        | TGTTCTGGAAAAATAAAGAAATGCC<br>AAAACAAGGATATGCGGTTGT  | 87  | NM_001086806<br>NM_001091687     |
| col9a1.L     | GCCAAGGACCTGCTGGTAG<br>GATTCAGGCCGACGTAGACT         | 112 | NM_001093327.1                   |
| LOC121394313 | GGATGCGGCTTTCCTGAGAA<br>GGTGTAATGGAGGGGAGTGG        | 120 | XR_005961647.1                   |
| angptl4.L    | GAAGGAGAAAAGTCCAGCGGT<br>AACAGTCCACCCTGCATCTGA      | 99  | XM_018255009                     |
| xmc          | GGATACCCTTTCCCCAACTGA<br>TGGACAATTCTGCCTCCAGC       | 120 | NM_001088686.1                   |
| chst3.L      | CCTAAGGCAGCAGTGTGTGG<br>CACACGGTCTGTGTTTATCTTGT     | 98  | XM_018225493                     |
| neurog2.L    | GACTCGACCCAACTCACCTG<br>TGTCGCAAGTGACAATGCTG        | 94  | NM_001088333                     |
| serpinh1.S   | CAGCCATGATCTCCAGAAACA<br>TGGCCAGGTAGAGGTCCTTC       | 110 | NM_001086790                     |
| bmpr1b.L     | CGATGCATATCGGGAGGTATACTA<br>TGTGGGCCGTAATCTCCTG     | 120 | XM_041590765                     |
| stx1a.L      | CACCTACAGAAGAACAGGGTGA<br>TGACTGCCTTCTTGGTGTCA      | 105 | XM_018246184                     |
| nek5.L       | GCTCCGAGACTTGTAGAAGGG<br>AACTTTACTCCACCCTCAGC       | 110 | XM_018247613                     |
| cdx4         | AAGACTCTCTGAAAGACAGGTAAA<br>CTCTGCACAGAACACATGCC    | 111 | NM_001087251<br>XM_018232950     |
| ankfn11.L    | ATCATCTCATTGACTACTTCCCA<br>CGGAGCAGGAATGAGATCTGT    | 85  | XM_041577568                     |
| ccn11.L      | CTGCTGCCTGTCATTGGGAT<br>GCAGGAGGCTTCCATCAGTT        | 108 | NM_001091541                     |
| gypc.L       | TGCTTGTGGATCTGCCTGAC<br>CATTCTCTGCAGGTGGCGTT        | 116 | XM_041576187.1                   |
| itga2.L      | AGCCTGGAGAGAAATCGGAA<br>GAAGAAGCCGAGCTTCCACA        | 110 | XM_018266172.2                   |
| cdx1.L       | CAGACATCCAGCGCCTTG<br>ACCAGATTTTTACCTGCCGT          | 120 | XM_018251931.2                   |
| kctd12.L     | AGCACTGGAATGGACAACCT<br>GCTCCCAGAATCCCCAACA         | 97  | NM_001094975                     |
| hes3.L       | AGAGAAAGCTGGAGAAAGCAGAT<br>TGTACAGTTGAGTTCCGTGAATA  | 90  | XM_018226118.2                   |
| gpx3.S       | AGATGGGGCTCAAACCTAGGG<br>AGTTGTAGCAATCCACCGATTTT    | 105 | NM_001092673                     |
| snai2.L      | CGCACTGAAAATGCCACGA<br>ATGGGGAGATGATCACTGTATGG      | 104 | NM_001086282                     |
| helq.S       | GTCAAACCTGTAAAACTAGTGCAGA<br>GAATTTTGACAGACACATGCCA | 113 | XM_041579752                     |
| chad.L       | CCACCCTACAGAGCCTAGCA<br>CTGCCATCTATCCACCTCCG        | 85  | XM_018235299.2                   |
| ppp1r9b.L    | CGCTACAAGAGAAGGTTGCAG<br>ACAAGCAGTAAGCACCACCA       | 120 | XM_018234825.2                   |
| neurog1.L    | CACACGAGCTCATTGCACAG<br>TCCATGTTGGAAGCCATTATCA      | 113 | XM_018252019.2                   |
| c2orf50.L    | CCGAGTGCCAAGGAGAAGG<br>TCCCCAATTCTCATGCCAGC         | 120 | XM_018264012.2                   |
| LOC108701132 | AGCAGCAAGAGACCGAGATG<br>CTGGATTGCACTTGATGCCG        | 99  | XM_018235361.2                   |

|                                                     |                                                       |     |                |
|-----------------------------------------------------|-------------------------------------------------------|-----|----------------|
| LOC108696684<br>(interleukin-11)                    | AATCATACCACAACCTTTAAAGCCA<br>ACAGCATTTCATTGAGACTACAGG | 85  | XM_018226270.2 |
| tshb.S                                              | CCCTGCCCCAAAAGAGAACCA<br>AAACACACACGAAAGCAGGC         | 91  | XM_018249167.2 |
| LOC108699267<br>(neuropeptide Y<br>receptor type 2) | CGGAAGGCAACATCCCATAAG<br>GCTTCAGACATCCTTTGCACC        | 112 | XM_018231250.2 |
| tbx6r.L                                             | GTGTGACGGGCTACAGGTTT<br>GAAGTTGGGCCCCAGAGAG           | 101 | NM_001097074   |
| LOC121398071<br>(histone H2A type<br>1-like)        | TCACTATCGCTCAGGGTGGA<br>AGCTCACTTGCTCTTAGCCG          | 95  | XM_041576621.1 |
| LOC108702520<br>(Hox-B8)                            | ATGAGACCACAAGCCGCC<br>TTTCGGGTCAGGTAGGGGTT            | 107 | XM_018238034.2 |
| ddit3.L                                             | CCAGTTGTTTTAGAGCAGGAGA<br>TGTCCACGAGCAAAGGAGAC        | 91  | NM_001089166   |
| acsbg2.S                                            | CTCTCAAAGAGCAGGTTCCA<br>TGTCTGCATTACATTGCACTTA        | 105 | XM_041579918   |
| jam3.S                                              | AGGACAAATGATGAGGGCGA<br>GTTAAGAGAGGAGTGGCGGG          | 100 | XM_018227682.2 |
| fstl1.L                                             | GAGCTGAGACCCAAGTCCAA<br>ATCCCCCTCCTTCCCTTAC           | 92  | NM_001095580   |
| hgf.S                                               | GAAGTACAAGTGCAAGGATCTGA<br>TTATCTGTGAGCAGTGCCAATACG   | 116 | XM_018255753.2 |
| rgs20.L                                             | GGATGGCGTGTGAAGACCTC<br>GGAGTCCAAGCTGACCTCTTT         | 119 | NM_001093411   |
| slc25a12.L                                          | AGACCACCTACACTGGGGTT<br>GCGAAACACTCGAGCTCCT           | 98  | NM_001091799   |
| gcnt1.L                                             | TTTGGCTGTCATTGTGGTCC<br>TGACGAATGGCACGAAGTGA          | 115 | NM_001087338   |
