# Supplementary material for: Mechanical Tensions Regulate Gene Expression in the Xenopus laevis Axial Tissues
Source: Int J Mol Sci. 2024 Jan 10;25(2):870. doi: 10.3390/ijms25020870 (PMC10815341; doi:10.3390/ijms25020870)
Supplement: Supplementary file 1 [file ijms-25-00870-s001.zip]

Archive with 9 entries (9 files):
- Fig. S1.tif
- Fig. S2.tif
- Fig. S3.tif
- Fig. S4.tif
- MovieS1.mov
- MovieS2.mov
- supplementary figures and legends.pdf
- Table S1.pdf
- Table_S2.xlsx
