# Supplementary material for: Mechanical Tensions Regulate Gene Expression in the Xenopus laevis Axial Tissues
Source: Int J Mol Sci. 2024 Jan 10;25(2):870. doi: 10.3390/ijms25020870 (PMC10815341; doi:10.3390/ijms25020870)
Supplement: Supplementary file 1 [file ijms-25-00870-s001.zip › Table_S2.xlsx]

## Sheet: Sheet1
name	logFC	logCPM	F (F-statistic from the quasi-likelihood F-test	PValue	significance (-logPValue)
tbxt.S	1.15079	6.79235	56.8223	5.60699e-12	11.2513
tbxt.L	1.64481	5.83701	55.2022	1.43747e-11	10.8424
socs3.S	1.72797	4.06276	50.9498	9.55084e-11	10.02
mmp21.L	-2.24051	1.04633	27.3721	1.72148e-07	6.7641
myf5.L	-2.00846	1.04659	23.7049	1.15309e-06	5.93814
fst.L	-1.21541	2.33622	25.1313	1.33694e-06	5.87389
frzb2.S	-4.55323	-0.234652	23.2741	1.40718e-06	5.85165
myf5.S	-4.61364	-0.199699	23.1653	1.49087e-06	5.82656
tbx6.S	-1.68634	0.987777	17.9897	2.2273e-05	4.65222
irx3.S	-1.35771	1.52782	17.6824	2.63955e-05	4.57847
cer1.S	-1.39404	1.21025	17.1788	3.40548e-05	4.46782
adamts7.L	-1.70045	0.765769	16.9975	3.74639e-05	4.42639
shh.L	-2.18079	0.31708	16.3742	5.24132e-05	4.28056
gbx2.1.S	-1.84875	0.70147	16.121	5.94736e-05	4.22568
irx3.L	-1.25043	1.55629	16.2347	6.06362e-05	4.21727
sfrp1.L	-1.56276	0.973018	15.9508	6.52132e-05	4.18566
foxc2.S	-2.26938	0.223879	15.8265	7.46234e-05	4.12712
lef1.S	-1.0048	1.94216	15.6294	7.71086e-05	4.1129
nalcn.S	-1.55205	0.903832	15.557	8.01179e-05	4.09627
tbxt.2.S	-1.44677	1.05396	15.5307	8.14371e-05	4.08918
gsc.S	-1.02784	1.84436	1.28775	0.000113271	3.94588
gsc.L	-2.23684	1.69451	8.13372	0.000119483	3.92269
cd82.S	-1.07044	6.78926	4.7095	0.000140035	3.85376
cd82.L	-1.09243	3.59534	2.21037	0.000150349	3.8229
prss8l.4.S	1.47005	1.33279	14.1491	0.00016899	3.77214
otx2.L	-1.31472	5.00756	2.37621	0.000173527	3.76063
LOC108716930	-1.15487	1.41324	13.9493	0.000187928	3.72601
otx2.S	-1.16697	5.46962	1.14511	0.000195212	3.70949
apobec2.L	-1.1676	1.40457	13.7931	0.000204882	3.6885
tnfrsf12a.L	1.06435	1.79556	13.7259	0.000211656	3.67437
fbn3.L	-1.79604	2.08312	20.5578	0.000229738	3.63877
LOC108700343	-1.31833	1.10179	13.4227	0.000248753	3.60423
foxc1.S	-1.49113	0.74917	13.4087	0.000250615	3.60099
six3.L	-1.56578	-1.57574	0.0984451	0.000253704	3.59567
otx1.S	-1.07481	3.35833	19.7021	0.000265435	3.57604
six3.S	-1.54158	-0.664479	2.92671	0.000271283	3.56658
aplnr.S	-1.1666	1.37152	13.2238	0.000276572	3.55819
frmpd1.L	1.02832	1.65137	13.0001	0.000311656	3.50632
cebpa.L	-1.46641	0.291332	2.8217	0.000324046	3.48939
col9a1.L	-1.67401	0.465621	12.6792	0.000369943	3.43187
cebpa.S	-1.14585	0.507955	0.616657	0.000424042	3.37259
LOC121394313	-1.04697	2.05453	12.3682	0.000436931	3.35959
angptl4.L	-1.07947	1.48094	12.255	0.000464456	3.33306
xmc.L	1.25701	3.27425	1.21866	0.000469034	3.3288
chst3.L	-1.81699	0.267952	12.0353	0.000522294	3.28208
neurog2.L	-1.10447	1.36536	12.0049	0.000530879	3.275
foxc2.L	-2.00857	0.0671487	11.4661	0.000710072	3.1487
serpinh1.S	-2.85259	-0.413958	11.2795	0.000784028	3.10567
bmpr1b.L	-1.05326	1.36409	11.0253	0.00089914	3.04617
stx1a.L	-1.64617	0.384242	11.0187	0.000902597	3.04451
nek5.L	-1.05117	1.35552	10.7898	0.00102163	2.99071
cdx4.S	1.06798	6.15191	0.76155	0.00107322	2.96931
ankfn1l.L	-1.0454	1.36424	10.6459	0.0011036	2.95719
ccn1l.L	1.29584	0.815786	9.85467	0.00169812	2.77003
cdx4.L	1.06148	6.53326	0.94641	0.00173245	2.76134
gypc.L	-1.47327	0.511818	9.80203	0.00174451	2.75833
itga2.L	-1.92565	0.0407743	9.66583	0.00187788	2.72633
cdx1.L	-1.13716	1.06959	9.64337	0.00190098	2.72102
kctd12.L	-1.0721	1.18455	9.44967	0.00211253	2.6752
hes3.L	-1.07869	1.06851	9.44847	0.00211594	2.6745
gpx3.S	-1.594	0.221251	9.32678	0.00225898	2.64609
snai2.L	1.53894	0.311836	9.22018	0.00239434	2.62081
helq.S	-1.60625	0.198013	9.19946	0.00242159	2.6159
chad.L	-1.18928	0.813742	9.19917	0.00242198	2.61583
ppp1r9b.L	-1.35638	0.608413	9.06126	0.00261158	2.5831
fbn3.S	-1.56199	0.340474	8.82349	0.00297621	2.52634
neurog1.L	-1.36133	0.448597	8.57892	0.00340166	2.46831
c2orf50.L	1.06938	1.06808	8.57683	0.00340558	2.46781
LOC108701132	-1.23375	0.547878	7.91519	0.00490545	2.30932
LOC108696684	1.09965	0.879261	7.71703	0.00547144	2.2619
tshb.S	1.12032	0.848194	7.69906	0.00552615	2.25758
LOC108699267	-1.28039	0.463481	7.64971	0.00567935	2.2457
tbx6r.L	-1.21301	0.646327	7.58362	0.00590027	2.22913
LOC121398071	-1.22893	0.468139	7.46952	0.00627653	2.20228
LOC108702520	-1.55131	0.0686174	7.29072	0.00693252	2.15911
ddit3.L	-1.63083	-0.0777776	7.25002	0.00709141	2.14927
acsbg2.S	1.05403	0.796369	7.12985	0.00758404	2.1201
jam3.S	-1.45059	0.145018	7.12607	0.00759853	2.11927
fstl1.L	-1.72107	-0.168907	7.02409	0.00804483	2.09448
hgf.S	-1.81985	-0.20161	7.01465	0.00808712	2.09221
rgs20.L	1.45924	0.0907769	6.77649	0.00923823	2.03441
slc25a12.L	-1.19827	0.403186	6.65517	0.00988981	2.00481
gcnt1.L	1.12074	0.562724	6.64479	0.00994627	2.00234
